# Supplementary material for: Allosteric activation of cell wall synthesis during bacterial growth
Source: PubMed Central journal article supplement (PMC10257715; doi:10.1038/s41467-023-39037-9), 2023-06-10
Supplement: 41467_2023_39037_MOESM1_ESM.pdf [file 41467_2023_39037_MOESM1_ESM.pdf]

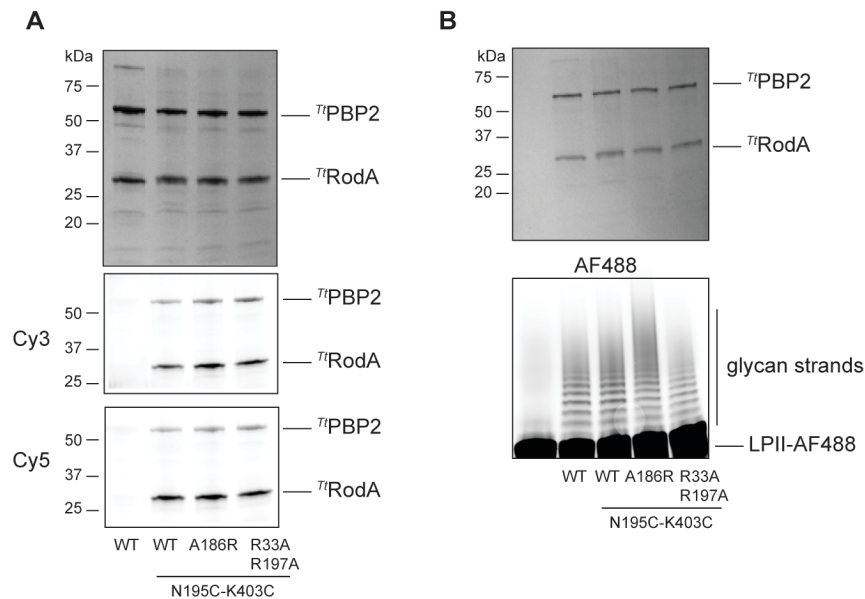

**Supplementary Figure 1.** Biochemical validation of  $^{71}$ RodA-PBP2 smFRET imaging constructs. A. Gels of fluorophore-labeled double-cysteine imaging mutants and mock-labeled  $^{71}$ WT control show specific incorporation of Cy3 and Cy5 fluorophores in RodA and PBP2 (pMS239, pSI7, pSI12, pSI13). Top: coomassie-stained control; middle: Cy3 signal; bottom: Cy5 signal. Images are representative of n=2 independent experiments. B. Imaging mutants retain activity after labeling (same constructs as A). Top: coomassie-stained control; bottom: Cy2 signal, showing polymerization of AF488-labeled lipid II. Images are representative of n=2 independent experiments.

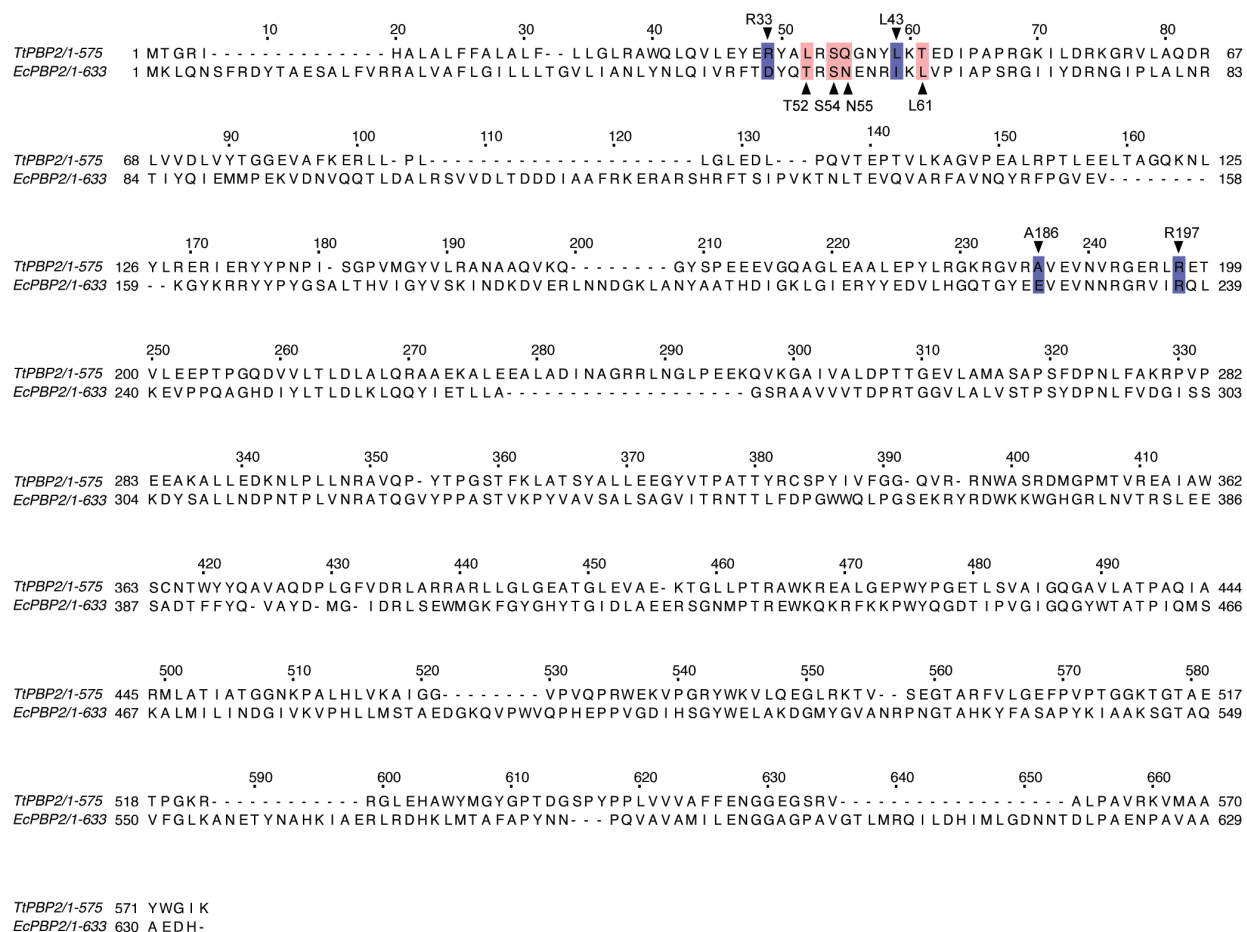

**Supplementary Figure 2.** Sequence alignment (Jalview) between *T. thermophilus* PBP2 and *E. coli* PBP2 showing the positions of hinge and interface mutants in blue (*Tt*PBP2) and in pink (*Ec*PBP2).

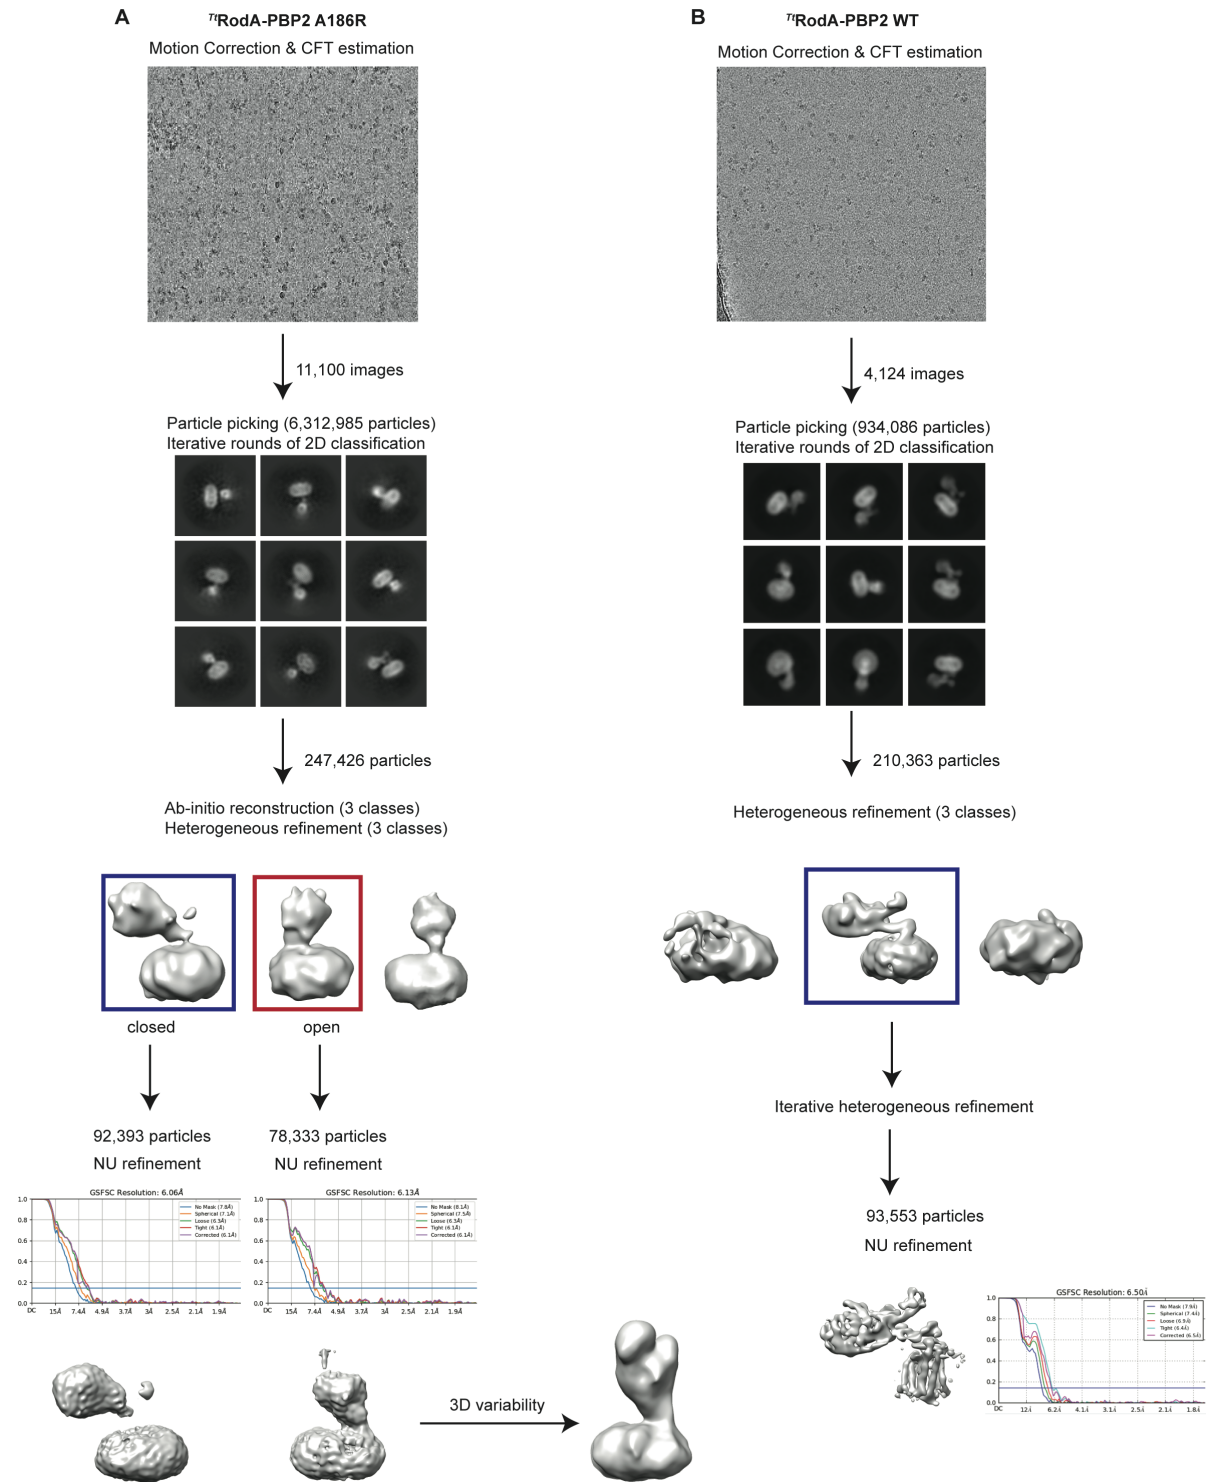

**Supplementary Figure 3.** Cryo-EM processing workflow for <sup>35</sup>S-RodA-PBP2 WT (A) and A186R mutant (B) samples.

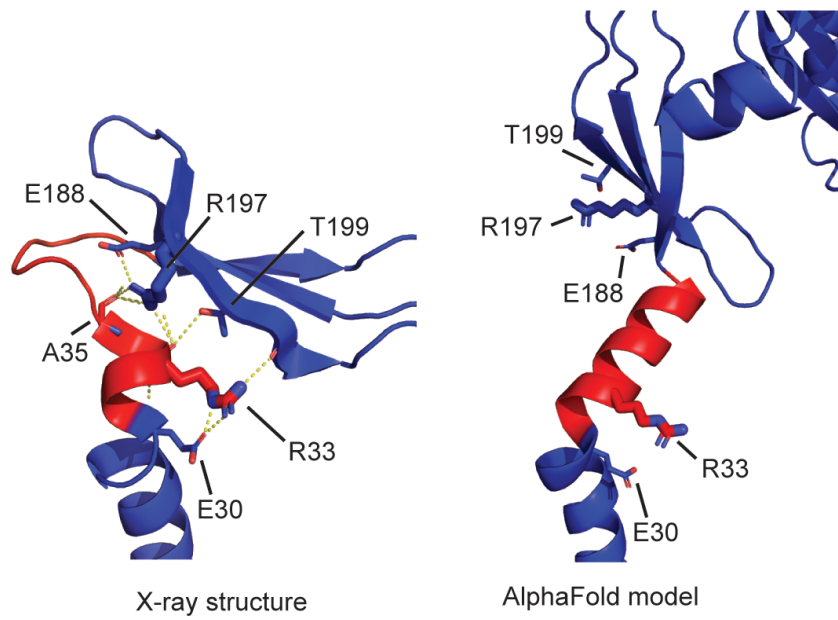

**Supplementary Figure 4.** Close-up view of the hinge region as in Fig. 2D., showing that the tight hydrogen-bond network mediated by R33 and R197 is lost in the open state.

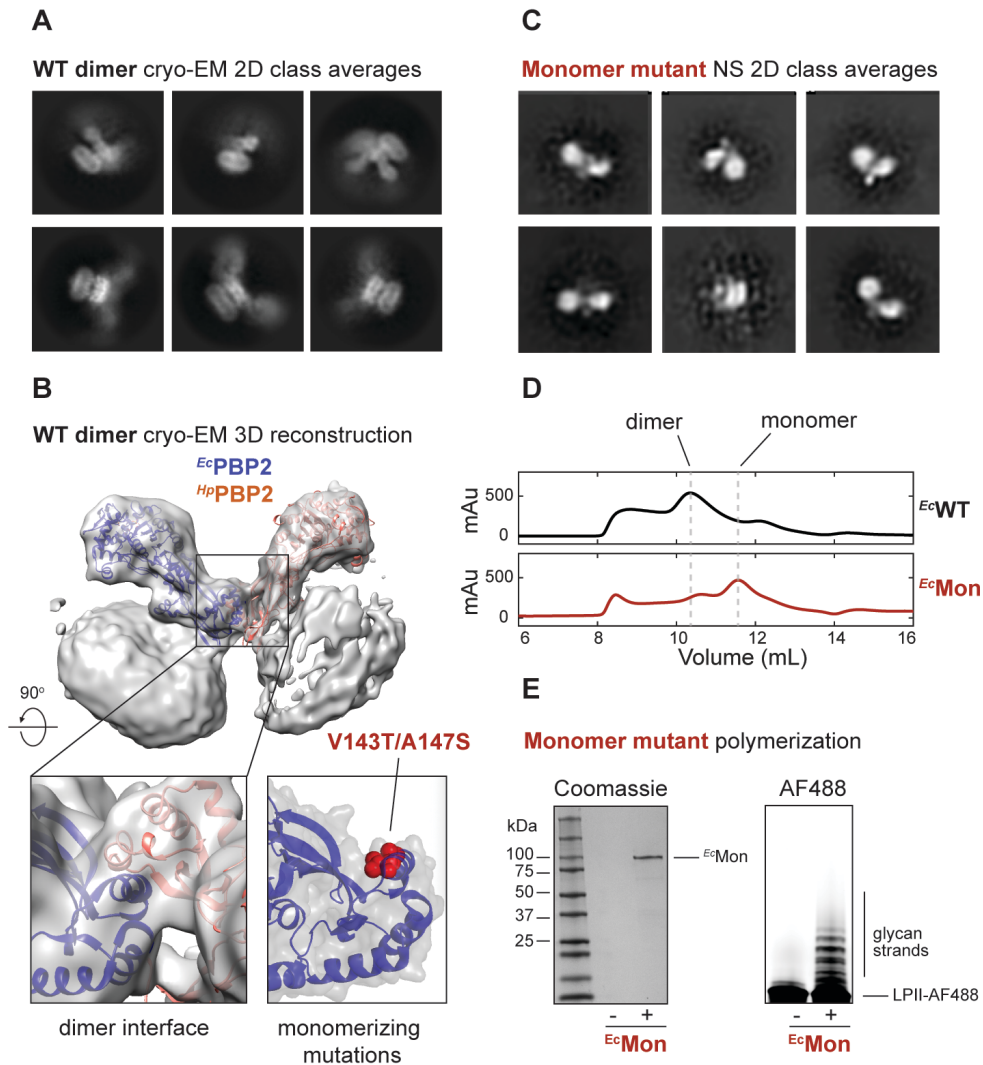

**Supplementary Figure 5.** Designing a monomeric *EcRodA-PBP2* construct.

A. Representative cryo-EM 2D class averages of *EcRodA-PBP2<sup>WT</sup>* fusion construct (pSS50) show that the protein forms 2 types of dimers (1:1 protein:micelle and 2:1 protein:micelle). Each class contains 2-2.5k particles. B. 3D reconstruction of the main population of 1:1 protein:micelle dimeric particles. The conformation of the pedestal domain of PBP2 appeared distinct in the two protomers: either with the anchor and head domains closed (blue), similar to X-ray structure of ecto-*EcPBP2* (PDB: 6g9f), or open (orange), similar to the MreC-bound state of ecto-*HpPBP2* (PDB: 5lp5). To resolve the dimer interface, *EcPBP2* and *HpPBP2* crystal structures were fit into the cryo-EM map, assuming a symmetric dimer (bottom left). Mutations (red spheres) were designed to disrupt dimerization by increasing the hydrophilicity of the dimerization helix (right). C. Representative negative-stain electron microscopy 2D class averages show that *EcRodA-PBP2<sup>V143T-A147S</sup>* mutant is monomeric (*EcMon*, pSI108). Each class contains ~500 particles. D. V143T-A147S mutations shift the size-exclusion elution profile of *EcRodA-PBP2*. E. Monomeric mutant retains polymerization activity. Left: coomassie-stained control; right: Cy2 excitation, showing polymerization of AF488-labeled lipid II. Images are representative of n=2 independent experiments.

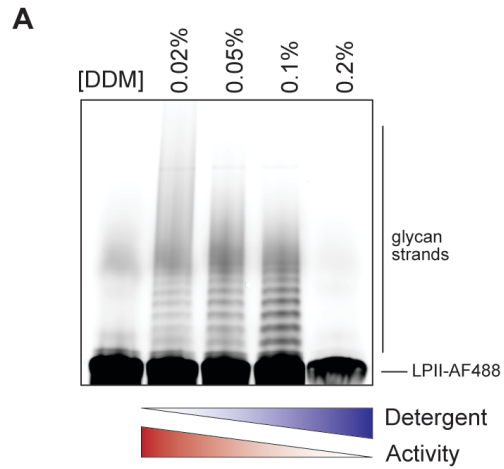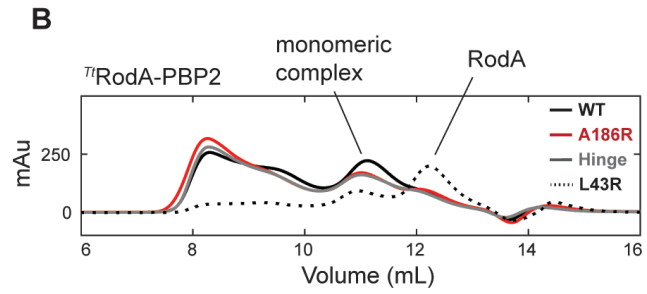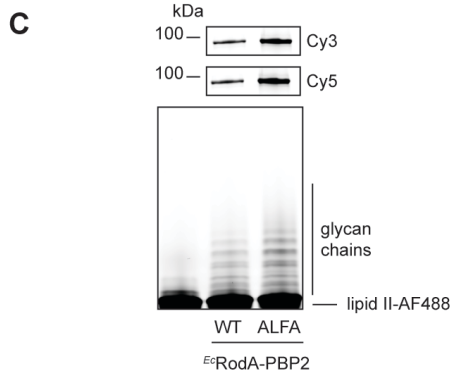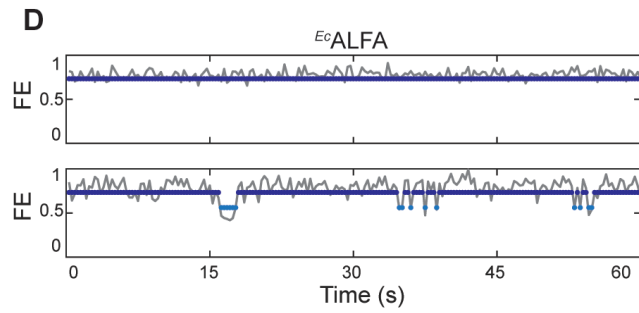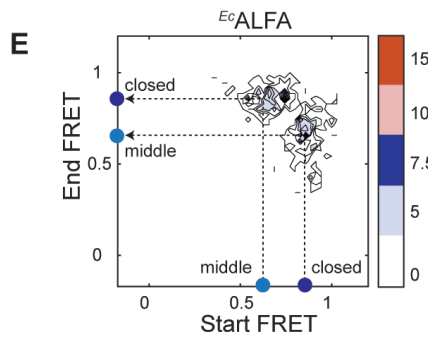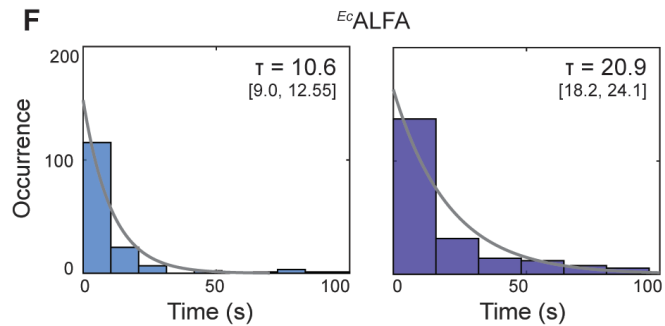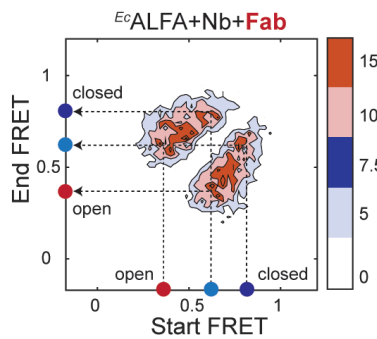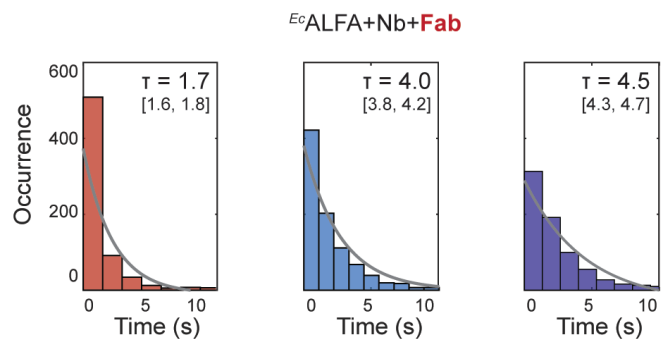

**Supplementary Figure 6.** Biochemical validation of constructs used in polymerization assays.

A. Detergent concentration dramatically affects polymerization activity. Polymerization activity of *Ec*RodA-PBP2<sup>Mon</sup> (pSI126) assayed under a range of DDM concentrations above CMC (0.02-0.2%). AF488-labeled glycan chains were visualized with Cy2 excitation. Images are representative of n=2 independent experiments. B. Size-exclusion elution (SEC) profiles of *T. thermophilus* RodA-PBP2 WT and mutants (pSI7, pSI12, pSI13, pMS292). All PBP2 mutants retain WT fold and form a stable complex with RodA except for L43R, which shows considerable dissociation into <sup>Ti</sup>RodA and <sup>Ti</sup>PBP2. C. *Ec*RodA-PBP2<sup>ALFA</sup> retains activity after labeling. Top: Cy3 and Cy5 signals, showing fluorophore labeling; bottom: Cy2 signal, showing polymerization of AF488-labeled lipid II. Images are representative of n=2 independent experiments. D. Representative trajectories of *Ec*ALFA with 1:1 Nb:Fab complex from Fig. 4C. Mean values of states are marked. E. Transition density plots, normalized to total observation time, show that dynamic exchange into the low-FRET state is dramatically increased upon addition of the Fab-Nb complex. F. Dwell time histograms and exponential fits for the low-FRET (red), middle-FRET (light blue) and high-FRET (blue) states for *Ec*ALFA with or without Nb-Fab. Mean dwell times alongside 95% confidence intervals for all populations are indicated on the plots.

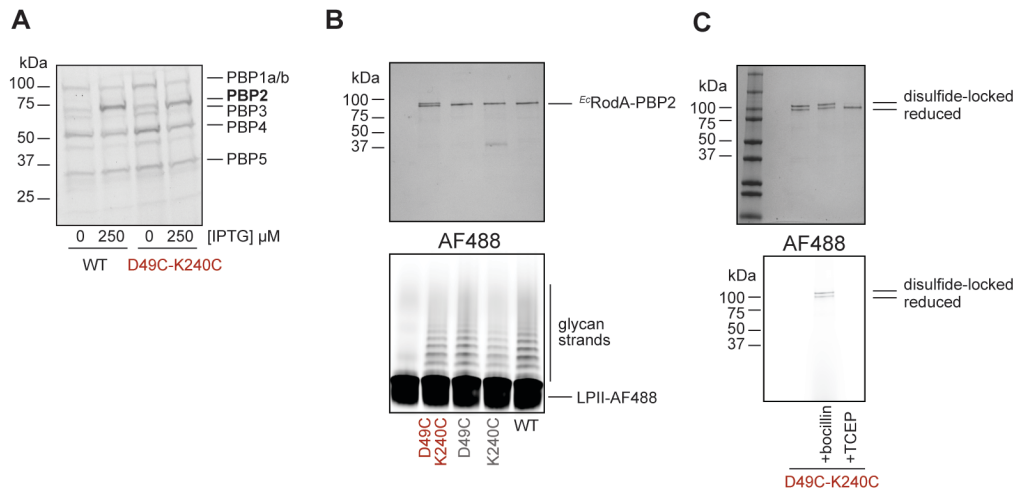

**Supplementary Figure 7.** Disulfide lock does not impair protein expression or fold.

A.  $E_c$ RodA-PBP2<sup>D49C-K240C</sup> mutant expresses at 0.5-1x of  $E_c$ RodA-PBP2<sup>WT</sup>. Bocillin labeling was used to visualize and quantify PBP2 expression levels upon induction with IPTG in complementation strains FB38/pHC857 and FB38/pSI47 (as in Fig. 5C). Image shown is representative of n=2 independent experiments. B. Polymerization assay, showing that introduction of cysteine mutations does not impair activity. Top: coomassie control. Bottom: AF488 excitation, showing polymerization of AF488-labeled lipid II. Images are representative of n=2 independent experiments. C.  $E_c$ PBP2<sup>D49C-K240C</sup> (pSI128) forms a disulfide with ~50% efficiency. Top: SDS-PAGE shows that  $E_c$ D49C-K240C sample contains a second band, in  $E_c$ Mon (compare with Fig. S3E), which disappears upon treatment with TCEP. The top and bottom bands were assigned to the disulfide-locked and reduced species, respectively. The efficiency of disulfide formation was quantified from the relative intensities of the two bands. Bottom: bocillin labeling visualized with Cy2 excitation. Images are representative of n=3 independent experiments.



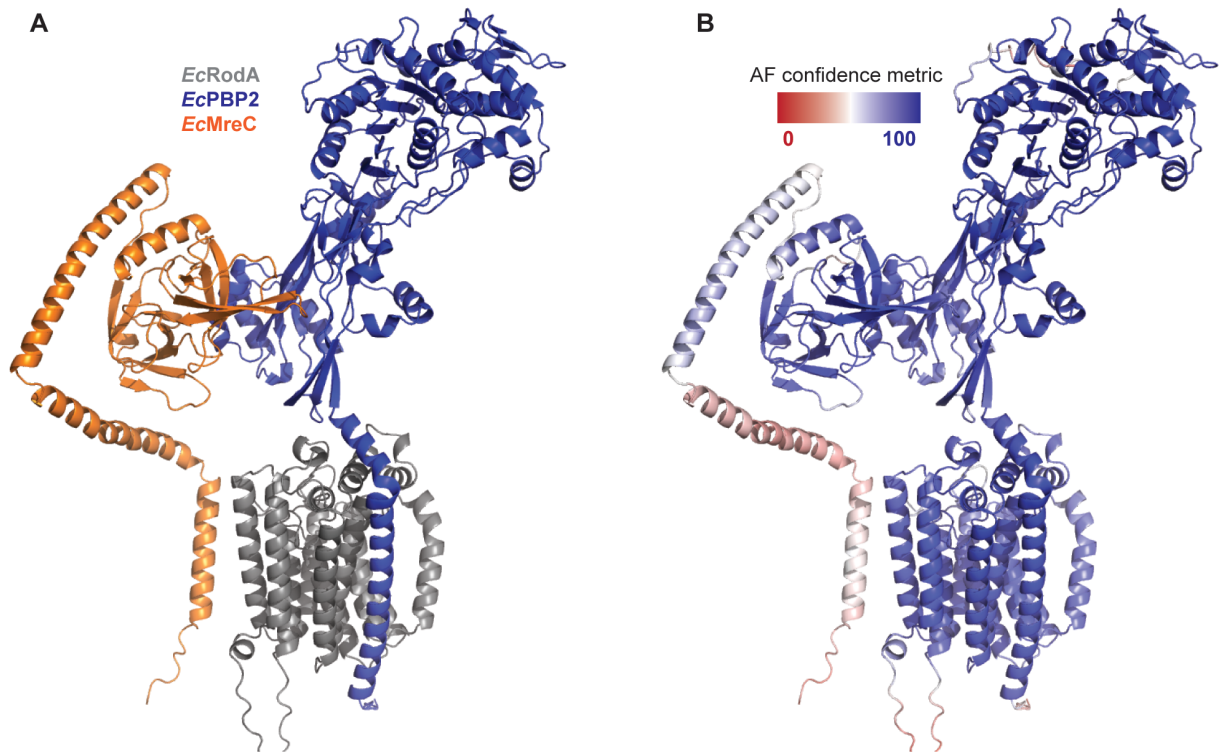

**Supplementary Figure 8.** AlphaFold model of the *Ec*RodA-PBP2-MreC complex. A. AlphaFold model of the complex between *Ec*RodA (grey), *Ec*PBP2 (blue) and *Ec*MreC monomer (orange). The model predicts that MreC binds the open configuration of PBP2 through contacts in the pedestal domain. B. The same complex as in A., colored by the per residue confidence metric (pLDDT). The binding interface between PBP2 and MreC is predicted with high confidence.

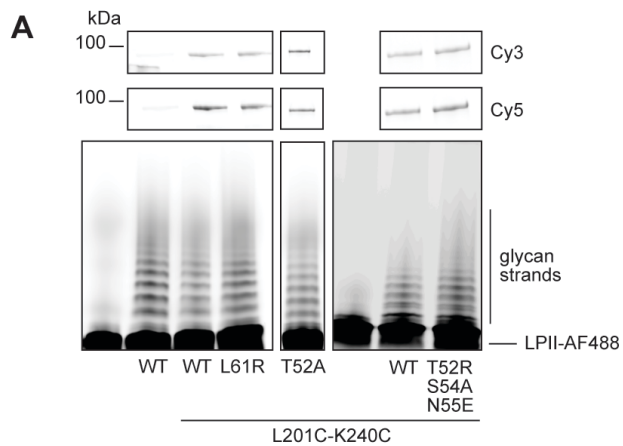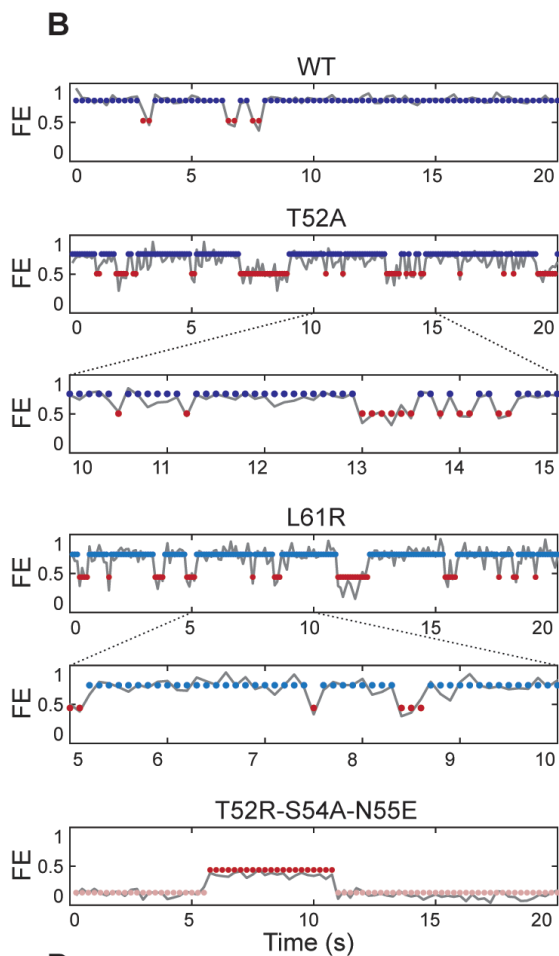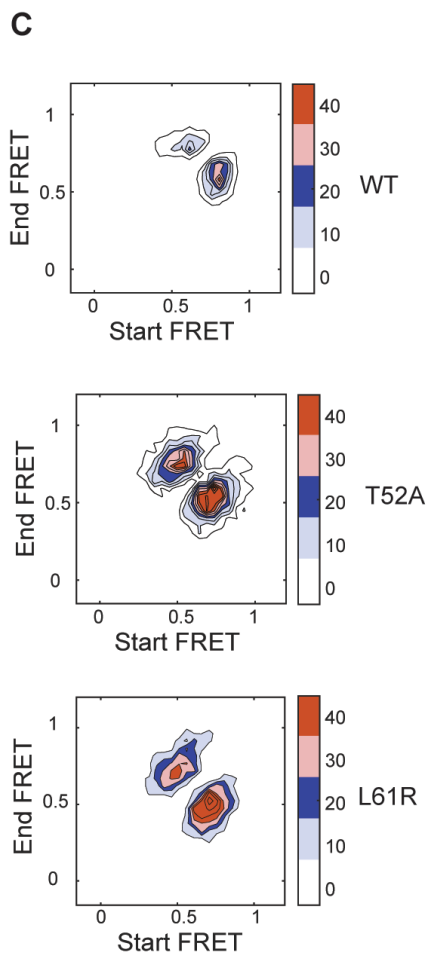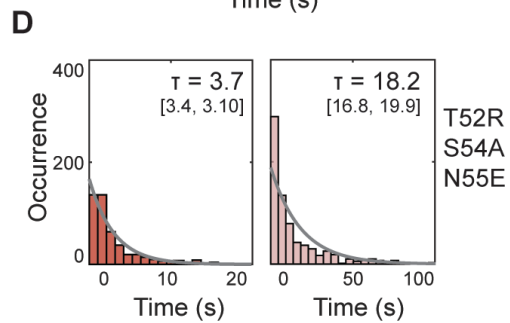

**Supplementary Figure 9.** Biochemical validation of *Ec*RodA-PBP2 smFRET imaging constructs. A. smFRET imaging constructs are specifically labeled with Cy3 and Cy5 fluorophores and retain activity after labeling. Top: Labeling gels of the double-cysteine imaging mutants and the mock-labeled *Ec*RodA-PBP2<sup>WT</sup> control (pSI131, pSI126, pSI127, pSI149, pSI152). Bottom: Lipid II-AF488 polymerization assay with the same constructs. Images are representative of n=2 independent experiments. B. Representative trajectories of smFRET constructs from Fig. 6B. *Ec*RodA-PBP2<sup>Mon</sup> trajectory is reproduced from Fig. 3 for comparison. The insets show expansions of *Ec*T52A and *Ec*L61R trajectories to highlight individual transition events. Note that these mutants were imaged at a higher frame rate than the rest of the constructs (10 s<sup>-1</sup> vs 4 s<sup>-1</sup>) to capture their faster dynamics. C. Transition plot analysis shows a comparison of transition frequency between dynamic mutants and *Ec*Mon (reproduced from Fig. 3C), normalized to total observation time. D. Dwell time histograms and exponential fits for the lowest-FRET (pink), and low-FRET (red) states for *Ec*RodA-PBP2<sup>T52R-S54A-N55E</sup>. Mean dwell times alongside 95% confidence intervals for all populations are indicated on the plots.

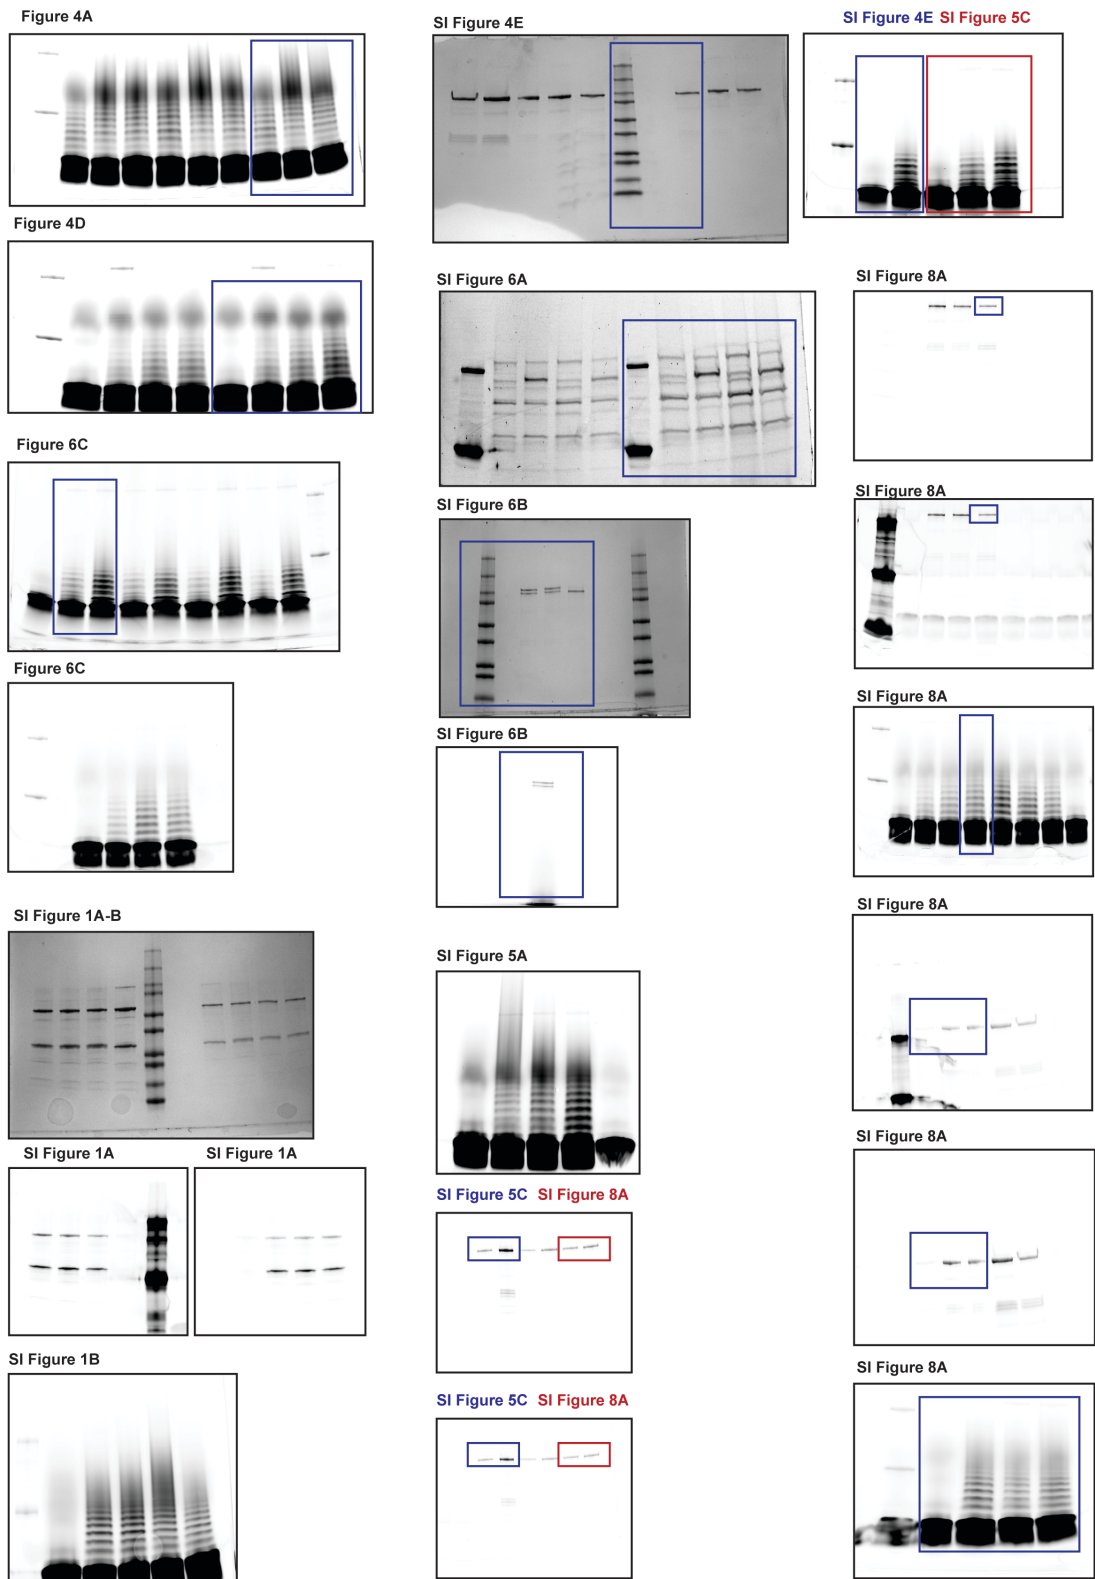

**Supplementary Figure 10.** Uncropped gels organized by figure. The regions shown in figures are marked with rectangles.

**Supplementary Table 1. smFRET trajectory parameters**

|                          | Construct      | Trajectories | Observations | Transitions | PDF fits (means)     |
|--------------------------|----------------|--------------|--------------|-------------|----------------------|
| $T^{\text{R}}$ RodA-PBP2 | WT             | 222          | 15,984       | 124*        | 0.83                 |
|                          | R33A-R197A     | 436          | 33,665       | 540         | 0.49<br>0.8          |
|                          | A186R          | 415          | 38,978       | 779         | 0.45<br>0.75         |
| $E^{\text{C}}$ RodA-PBP2 | WT             | 270          | 59,064       | 2045        | 0.52<br>0.78         |
|                          | ALFA           | 94           | 17,423       | 400         | 0.60<br>0.87         |
|                          | ALFA + Nb-Fab  | 122          | 30,341       | 4196        | 0.38<br>0.63<br>0.77 |
|                          | T52A           | 173          | 66,054       | 2684        | 0.5<br>0.78          |
|                          | L61R           | 100          | 35,745       | 1886        | 0.42<br>0.67<br>0.90 |
|                          | T52R-S54A-N55E | 195          | 45,262       | 1048        | 0.16<br>0.45         |

\*Note that virtually none of  $T^{\text{R}}$ WT “transitions” are bona fide, i.e., they are an artifact of fitting the data to a two-state model and correspond to exchange within the high-FRET state, rather than to true cross-state exchange.

**Supplementary Table 2. Cryo-EM sample preparation and data collection**

|                                 | <i>Tt</i> RodA-PBP2 <sup>WT</sup> | <i>Tt</i> RodA-PBP2 <sup>A186R</sup> | <i>Ec</i> RodA-PBP2 <sup>WT</sup>      |
|---------------------------------|-----------------------------------|--------------------------------------|----------------------------------------|
| Grid type                       | C-flat holey carbon               | C-flat holey carbon                  | UltrAuFoil holey gold                  |
| Protein concentration           | 3.5 mg/mL                         | 3 mg/mL                              | 3 mg/mL                                |
| Blotting parameters             | 7 s blot time<br>15 blot force    | 7 s blot time<br>15 blot force       | 7 s blot time<br>15 blot force         |
| Microscope                      | Titan Krios                       | Titan Krios                          | Titan Krios                            |
| Pixel size (Å)                  | 0.825                             | 0.825                                | 0.825                                  |
| Voltage (kV)                    | 300                               | 300                                  | 300                                    |
| Detector                        | K3                                | K3                                   | K3                                     |
| Total exposure (e-/Å)           | 64                                | 58                                   | 59                                     |
| Defocus range (µm)              | -1 to -2.5                        | -1.2 to -2.5                         | -1.2 to -2.5                           |
| Number of frames per micrograph | 50                                | 54                                   | 57                                     |
| Exposure time (s)               | 3                                 | 1.4                                  | 2                                      |
| Final particles                 | 93,553                            | 78,333 (open)<br>92,393 (closed)     | 78,031 (1:1 protein:<br>micelle dimer) |
| Symmetry                        | C1                                | C1                                   | C1                                     |
| Nominal resolution (Å)          | 6.5                               | 6.1 (closed)<br>NA (open)            | 9                                      |

**Supplementary Table 3: bacterial strains used for *in vivo* assays**

| <b>Strain</b> | <b>Genotype</b>                                                                           | <b>Source</b>            |
|---------------|-------------------------------------------------------------------------------------------|--------------------------|
| MG1655        | <i>rph1 ilvG rfb-50</i>                                                                   | Guyer et al. 1981        |
| MG1655/pSI56  | <i>rph1 ilvG rfb-50 / P<sub>lac</sub>:pbpA-rodA</i>                                       | This study               |
| MG1655/pSI57  | <i>rph1 ilvG rfb-50 / P<sub>lac</sub>:pbpA(D49C-K240C)-rodA</i>                           | This study               |
| MG1655/pSI58  | <i>rph1 ilvG rfb-50 / P<sub>lac</sub>:pbpA(D49C)-rodA</i>                                 | This study               |
| MG1655/pSI59  | <i>rph1 ilvG rfb-50 / P<sub>lac</sub>:pbpA(K240C)-rodA</i>                                | This study               |
| MG1655/pSI63  | <i>rph1 ilvG rfb-50 / P<sub>lac</sub>:pbpA(S330A)-rodA</i>                                | This study               |
| MG1655/pHC857 | <i>rph1 ilvG rfb-50 / P<sub>lac</sub>:pbpA-rodA</i>                                       | This study               |
| MG1655/pHC858 | <i>rph1 ilvG rfb-50 / P<sub>lac</sub>:pbpA(S330A)-rodA</i>                                | This study               |
| MG1655/pSI47  | <i>rph1 ilvG rfb-50 / P<sub>lac</sub>:pbpA(D49C-K240C)-rodA</i>                           | This study               |
| MG1655/pSI48  | <i>rph1 ilvG rfb-50 / P<sub>lac</sub>:pbpA(D49C)-rodA</i>                                 | This study               |
| MG1655/pSI49  | <i>ph1 ilvG rfb-50 / P<sub>lac</sub>:pbpA(K240C)-rodA</i>                                 | This study               |
| MG1655/pSI154 | <i>rph1 ilvG rfb-50 / P<sub>lac</sub>:pbpA(T52A)-rodA</i>                                 | This study               |
| MG1655/pSI157 | <i>rph1 ilvG rfb-50 / P<sub>lac</sub>:pbpA(T52R-S54A-N55E)-rodA</i>                       | This study               |
| MG1655/pRY47  | <i>rph1 ilvG rfb-50 / P<sub>lac</sub>: empty</i>                                          | This study               |
| FB38          | <i>rph1 ilvG rfb-50 ΔlacIZYA::frit mrdAB::aph</i>                                         | Bendezu & de Boer, 2008  |
| FB38/pHC857   | <i>rph1 ilvG rfb-50 ΔlacIZYA::frit mrdAB::aph / P<sub>lac</sub>:pbpA-rodA</i>             | P1(FB38) x MG1655/pHC857 |
| FB38/pHC858   | <i>rph1 ilvG rfb-50 ΔlacIZYA::frit mrdAB::aph / P<sub>lac</sub>:pbpA(S330A)-rodA</i>      | P1(FB38) x MG1655/pHC858 |
| FB38/pSI47    | <i>rph1 ilvG rfb-50 ΔlacIZYA::frit mrdAB::aph / P<sub>lac</sub>:pbpA(D49C-K240C)-rodA</i> | P1(FB38) x MG1655/pSI47  |
| FB38/pSI48    | <i>rph1 ilvG rfb-50 ΔlacIZYA::frit mrdAB::aph / P<sub>lac</sub>:pbpA(D49C)-rodA</i>       | P1(FB38) x MG1655/pSI48  |
| FB38/pSI49    | <i>rph1 ilvG rfb-50 ΔlacIZYA::frit mrdAB::aph / P<sub>lac</sub>:pbpA(K240C)-rodA</i>      | P1(FB38) x MG1655/pSI49  |

|            |                                                                                          |                               |
|------------|------------------------------------------------------------------------------------------|-------------------------------|
| PR5        | <i>rph1 ilvG rfb-50 mreC(R292H) yrdE-kan</i>                                             | Rohs et al. 2018              |
| PR5/pHC857 | <i>rph1 ilvG rfb-50 mreC(R292H) yrdE-kan / P<sub>lac</sub>:pbpA-rodA</i>                 | P1(PR5)<br>x<br>MG1655/pHC857 |
| PR5/pSI154 | <i>rph1 ilvG rfb-50 mreC(R292H) yrdE-kan / P<sub>lac</sub>:pbpA(T52A)-rodA</i>           | P1(PR5)<br>x MG1655/pSI154    |
| PR5/pSI157 | <i>rph1 ilvG rfb-50 mreC(R292H) yrdE-kan / P<sub>lac</sub>:pbpA(T52R-S54A-N55E)-rodA</i> | P1(PR5)<br>x MG1655/pSI157    |
| PR5/pRY47  | <i>rph1 ilvG rfb-50 mreC(R292H) yrdE-kan / P<sub>lac</sub>:empty</i>                     | P1(PR5)<br>x MG1655/pRY47     |



**Supplementary Table 4: plasmids used for *in vivo* assays**

| <b>Plasmid</b> | <b>Genotype</b>                                                       | <b>ori</b> | <b>Source</b>   |
|----------------|-----------------------------------------------------------------------|------------|-----------------|
| pHC857         | <i>cat lacI<sup>q</sup> P<sub>lac</sub>:pbpA-rodA</i>                 | pBR/colE1  | Cho et al. 2014 |
| pHC858         | <i>cat lacI<sup>q</sup> P<sub>lac</sub>:pbpA(S330A)-rodA</i>          | pBR/colE1  | Cho et al. 2014 |
| pSI47          | <i>cat lacI<sup>q</sup> P<sub>lac</sub>:pbpA(D49C-K240C)-rodA</i>     | pBR/colE1  | This study      |
| pSI48          | <i>cat lacI<sup>q</sup> P<sub>lac</sub>:pbpA(D49C)-rodA</i>           | pBR/colE1  | This study      |
| pSI49          | <i>cat lacI<sup>q</sup> P<sub>lac</sub>:pbpA(K240C)-rodA</i>          | pBR/colE1  | This study      |
| pHC800         | <i>cat lacI<sup>q</sup> P<sub>tac</sub></i>                           | pBR/colE1  | Cho et al. 2014 |
| pSI56          | <i>cat lacI<sup>q</sup> P<sub>tac</sub>:pbpA-rodA</i>                 | pBR/colE1  | This study      |
| pSI57          | <i>cat lacI<sup>q</sup> P<sub>tac</sub>:pbpA(D49C-K240C)-rodA</i>     | pBR/colE1  | This study      |
| pSI58          | <i>cat lacI<sup>q</sup> P<sub>tac</sub>:pbpA(D49C)-rodA</i>           | pBR/colE1  | This study      |
| pSI59          | <i>cat lacI<sup>q</sup> P<sub>tac</sub>:pbpA(K240C)-rodA</i>          | pBR/colE1  | This study      |
| pSI63          | <i>cat lacI<sup>q</sup> P<sub>tac</sub>:pbpA(S330A)-rodA</i>          | pBR/colE1  | This study      |
| pSI154         | <i>cat lacI<sup>q</sup> P<sub>lac</sub>:pbpA(T52A)-rodA</i>           | pBR/colE1  | This study      |
| pSI157         | <i>cat lacI<sup>q</sup> P<sub>lac</sub>:pbpA(T52R-S54A-N55E)-rodA</i> | pBR/colE1  | This study      |
| pRY47          | <i>cat lacI<sup>q</sup> P<sub>lac</sub>: empty</i>                    | pBR/colE1  | Cho et al. 2014 |

**Supplementary Table 5: plasmids used for *in vitro* assays**

| <b>Plasmid</b> | <b>Genotype</b>                                                                                       | <b>Source</b>     |
|----------------|-------------------------------------------------------------------------------------------------------|-------------------|
| pMS239         | <i>ColA-T7:TtPBP2-3C-PrtC; P<sub>T7</sub>:His6-SUMO-Flag-3C-TtRodA</i>                                | Sjodt et al. 2020 |
| pMS292         | <i>ColA-T7:TtPBP2(L43R)-3C-PrtC; P<sub>T7</sub>:His6-SUMO-Flag-3C-TtRodA</i>                          |                   |
| pMS293         | <i>ColA-T7:TtPBP2(A186R)-3C-PrtC; P<sub>T7</sub>:His6-SUMO-Flag-3C-TtRodA</i>                         | Sjodt et al. 2020 |
| pSI7           | <i>ColA-T7:TtPBP2(K403C)-3C-PrtC; P<sub>T7</sub>:His6-SUMO-Flag-Avitag-TtRodA(N195C)</i>              | This study        |
| pSI12          | <i>ColA-T7:TtPBP2(A186R-K403C)-3C-PrtC; P<sub>T7</sub>:His6-SUMO-Flag-Avitag-TtRodA(N195C)</i>        | This study        |
| pSI13          | <i>ColA-T7:TtPBP2(R33A-R197A-K403C)-3C-PrtC; P<sub>T7</sub>:His6-SUMO-Flag-Avitag-TtRodA(N195C)</i>   | This study        |
| pSS50          | <i>pAM205-T7:His6-SUMO-Flag-3C-EcPBP2-GGGSx3-EcRodA</i>                                               | Rohs et al. 2018  |
| pSI108         | <i>T7:His6-SUMO-Flag-3C-EcPBP2(V143T-A147S)-GGGSx3-EcRodA</i>                                         | This study        |
| pSI126         | <i>T7:His6-SUMO-Flag-3C-EcPBP2(V143T-A147S-R425C)-GGGSx3-EcRodA(C133A-L201C)</i>                      | This study        |
| pSI147         | <i>T7:His6-SUMO-Flag-3C-EcPBP2(V143T-A147S-[I182-ALFA tag-A201] R425C)-GGGSx3-EcRodA(C133A-L201C)</i> | This study        |
| pSI127         | <i>T7:His6-SUMO-Flag-3C-EcPBP2(L61R-V143T-A147S-R425C)-GGGSx3-EcRodA(C133A-L201C)</i>                 | This study        |
| pSI128         | <i>T7:His6-SUMO-Flag-3C-EcPBP2(D49C-K240C-V143T-A147S)-GGGSx3-EcRodA(C133A)</i>                       | This study        |
| pSI129         | <i>T7:His6-SUMO-Flag-3C-EcPBP2(D49C-V143T-A147S)-GGGSx3-EcRodA(C133A)</i>                             | This study        |
| pSI130         | <i>T7:His6-SUMO-Flag-3C-EcPBP2(K240C-V143T-A147S)-GGGSx3-EcRodA(C133A)</i>                            | This study        |
| pSI131         | <i>T7:His6-SUMO-Flag-3C-EcPBP2(V143T-A147S)-GGGSx3-EcRodA(C133A)</i>                                  | This study        |

|         |                                                                                                 |                                                                 |
|---------|-------------------------------------------------------------------------------------------------|-----------------------------------------------------------------|
| pSI149  | <i>T7:His6-SUMO-Flag-3C-EcPBP2(T52A-V143T-A147S-R425C)-GGGSx3-EcRodA(C133A-L201C)</i>           | This study                                                      |
| pSI152  | <i>T7:His6-SUMO-Flag-3C-EcPBP2(T52R-S54A-N55E-V143T-A147S-R425C)-GGGSx3-EcRodA(C133A-L201C)</i> | This study                                                      |
| pSI145  | <i>pET26b-T7:PeIB-NbALFA-6xHis</i>                                                              | This study, nanobody sequence from Götzke & Kilisch et al. 2019 |
| pSI146  | <i>pET26b-T7:PeIB-NbALFA(Q116K-Q119P)-6xHis</i>                                                 | This study                                                      |
| pMAS478 | <i>pTarget: heavy chain</i>                                                                     | This study, Fab sequence from Bloch et al. 2021                 |
| pMAS481 | <i>pD2610-v5: light chain</i>                                                                   | This study, Fab sequence from Bloch et al. 2021                 |

**Supplementary Table 6: primers used for Gibson assembly**

| Primer name                        | Primer sequence                                                                           |
|------------------------------------|-------------------------------------------------------------------------------------------|
| N195C.fwd<br>N195C.rev             | 5'-ccaactgccgtctggcctgtctgaaaccatatcaacg-3'<br>5-cgttgatatggttcagacaaggccagacggcagttgg-3' |
| K403C.fwd<br>K403C.rev             | 5'- ggaagttgcagagtgaccgggcttcttccactcgc-3'<br>5-gcgagtggaagaagcccggcactctgcaactcc-3'      |
| A186R.fwd<br>A186R.rev             | 5'- cgcggggtgcgtcgagtagaggtaatgtg-3'<br>5'- gcacattgacctactcgcagcaccgccgcg-3'             |
| R33A.fwd<br>R33A.rev               | 5'-caggtgctggaatatgaggcttatgcgcttcgc-3'<br>5'-gcgaagcgcataagcctcatattccagcacctg-3'        |
| R197A.fwd<br>R197C.rev             | 5'-gcgcggtgaacgcttagccgaaacagtttagagg-3'<br>5'-cctctaaaactgttccggctaagcgttcaccgcgc-3'     |
| V143T-A147S.fwd<br>V143T-A147S.rev | 5'-gaccgaagtacaaacagctcgctttccgtaacag -3'<br>5'-ctgattgacggaaaagcagagctgtttgtactcggtc -3' |
| R425C.fwd<br>R425C.rev             | 5'-ctggcggaagaatgctccggcaacatgc -3'<br>5'-catgttgccggagcattctccgccagg -3'                 |
| C133A.fwd<br>C133A.rev             | 5'-caaccgcgacgttgccccgccatcggtt-3'<br>5'-aacgatggcggggcaacgtcgcggttg-3'                   |

|                                          |                                                                                                           |
|------------------------------------------|-----------------------------------------------------------------------------------------------------------|
| L201C.fwd<br>L201C.rev                   | 5'-ctgtggttcttctgcatgcatgattaccagcgc-3'<br>5'-gcgctggaatcatgcatgcagaagaaccacag-3'                         |
| L61R.fwd<br>L61R.rev                     | 5'-gaaaaccgcattaagcgtgtgcctatcgcg-3'<br>5'-gcgcgataggcacacgcttaatgcggtttc-3'                              |
| T52A.fwd<br>T52A.rev                     | 5'-ccgactaccaggcccgtctaatgaaaac-3'<br>5'-gtttcattagagcgggcctggtagtcgg-3'                                  |
| T52R-S54A-N55E.fwd<br>T52R-S54A-N55E.rev | 5'-cgctttaccgactaccagcgcgcgctgaggaaaaccgcattaagc-3'<br>5'-gcttaatgcggtttcctcagcgcggcgtggtagtcggtaaagcg-3' |
| D49C.fwd<br>D49C.rev                     | 5'-gttcgctttacctgctaccagacccgc-3'<br>5'-gcgggtctggtagcaggtaaagcgaac-3'                                    |
| K240C.fwd<br>K240C.rev                   | 5'-gttattcgccagttatgtgaagtaccaccgcaagc-3'<br>5'-gcttgcggtggtacttcacataactggcgaataac-3'                    |
